# Supplementary material for: Prevalence of extended spectrum beta lactamase and plasmid mediated quinolone resistant genes in strains of Klebsiella pneumonia, Morganella morganii, Leclercia adecarboxylata and Citrobacter freundii isolated from poultry in South Western Nigeria
Source: PeerJ. 2018 Jun 22;6:e5053. doi: 10.7717/peerj.5053 (PMC6016527; doi:10.7717/peerj.5053)
Supplement: Data S1 [file peerj-06-5053-s001.xlsx]

## Sheet: esbl barchart
Row Labels	CTX Gene	SHV Gene	TEM Gene
Citrobacter freundii	6.7	0	3.8
Klebsiella pneumoniae	53.3	66.7	48.1
Leclercia adecarboxylata	6.7	11.1	25.9
Morganella morganii	33.3	22.2	22.2
Grand Total	100	100	100

## Sheet: pmqr barchart
Row Labels	Sum of qnrA	Sum of qnrB	Sum of qnrS	Sum of OqxB	Sum of qep
Citrobacter freundii	0	0	0	0	0
Klebsiella pneumoniae	0	2	0	9	2
Leclercia adecarboxylata	1	1	0	2	1
Morganella morganii	0	0	0	0	0
Grand Total	1	3	0	11	3

## Sheet: Percentage
	ESBL Genes		CTX Gene	PMQR Genes
Organism	SHV	TEM	CTX	qnrA	qnrB	qnrS	OqxB	qep
Klebsiella pneumoniae	66.7	48.1	53.3	0	2	0	9	2
Morganella morganii	22.2	22.2	33.3	0	0	0	0	0
Leclercia adecarboxylata	11.1	25.9	6.7	1	1	0	2	1
Citrobacter freundii	0	3.8	6.7	0	0	0	0	0
Total	100	100	100

## Sheet: Raw Result
S/N	ORGANISM	NAME OF POULTRY	BED	SHV	TEM	CTX
1	Klebsiella pneumoniae	Poultry A	1	-	+	-
2	Klebsiella pneumoniae	Poultry B	2	+	+	-
3	Klebsiella pneumoniae	Poultry B	3	+	+	-
4	Klebsiella pneumoniae	Poultry B	7	+	+	-
5	Klebsiella pneumoniae	Poultry B	8	+	+	-
6	Klebsiella pneumoniae	Poultry B	9	+	+	-
7	Klebsiella pneumoniae	Poultry B	9	+	+	-
8	Klebsiella pneumoniae	Poultry B	10	+	-	-
9	Klebsiella pneumoniae	Poultry B	12	+	+	-
10	Klebsiella pneumoniae	Poultry B	13	+	-	+
11	Klebsiella pneumoniae	Poultry B	14	+	-	-
12	Klebsiella pneumoniae	Poultry B	16	-	-	-
13	Leclercia adecarboxylata	Poultry B	16	-	+	-
14	Klebsiella pneumoniae	Poultry B	17	-	+	+
15	Klebsiella pneumoniae	Poultry B	18	-	-	-
16	Klebsiella pneumoniae	Poultry D	3	-	-	-
17	Klebsiella pneumoniae	Poultry D	5	-	-	+
18	Morganella morganii	Poultry C	1	-	-	-
19	Leclercia adecarboxylata	Poultry C	5	-	+	-
20	Morganella morganii	Poultry C	6	-	-	+
21	Morganella morganii	Poultry C	7	-	-	-
22	Leclercia adecarboxylata	Poultry C	8	-	+	+
23	Leclercia adecarboxylata	Poultry C	10	-	+	-
24	Morganella morganii	Poultry C	11	-	-	-
25	Leclercia adecarboxylata	Poultry C	12	+	+	-
26	Morganella morganii	Poultry C	16	+	+	-
27	Morganella morganii	Poultry C	17	+	+	-
28	Morganella morganii	Poultry C	18	+	+	+
29	Klebsiella pneumoniae	Poultry C	19	-	-	+
30	Klebsiella pneumoniae	Poultry C	20	-	-	-
31	Klebsiella pneumoniae	Poultry C	21	+	+	+
32	Citrobacter freundii	Poultry C	24	-	+	+
33	Morganella morganii	Poultry C	26	+	+	+
34	Morganella morganii	Poultry C	28	-	+	+
35	Morganella morganii	Poultry C	28	-	-	+
36	Leclercia adecarboxylata	Poultry C	25	+	+	+
37	Morganella morganii	Poultry C	33	-	-	+
38	Klebsiella pneumoniae	Poultry C	33	-	+	-
39	Klebsiella pneumoniae	Poultry C	34	+	+	-
40	Leclercia adecarboxylata	Poultry C	36	-	+	-
`41	Morganella morganii	Poultry C	37	-	-	+
42	Morganella morganii	Poultry C	39	-	+	-
43	Klebsiella pneumoniae			-	+	+
