# Supplementary material for: Prevalence of extended spectrum beta lactamase and plasmid mediated quinolone resistant genes in strains of Klebsiella pneumonia, Morganella morganii, Leclercia adecarboxylata and Citrobacter freundii isolated from poultry in South Western Nigeria
Source: PeerJ. 2018 Jun 22;6:e5053. doi: 10.7717/peerj.5053 (PMC6016527; doi:10.7717/peerj.5053)
Supplement: Data S2 [file peerj-06-5053-s002.xlsx]

## Sheet: Sheet1
					Antibiotics MIC
No	Poultry source	Bird no	identity	fos	gen	tm/s	tob	cip	mox	p/t	pip	cft	cfz	cef	imi	mer	azt	tig	col	am	E
109	Poultry A	24	C. freundii	16 S	˃16 R	˃320 R	˃16 R	1 I	2 R		˃128 R	˃64 R	16 R	32 R	0.25 S	0.25 S	˃64 R	0.5 S	0.5 S	2 S
9	Poultry B	6	K. pneumonia	32 R	˃16 R	˃320 R	8 R	0.5S	0.25	32R	˃128 R	˃64 R	4 I	2 I	1 S	0.25 S	16 R	1 R	4 R	2 S
16	Poultry B	1	K. pneumonia	32 S	˃16 R	˃320 R	8 R	0.25	0.25	16	˃128 R	32 R	4 I	2 I	0.25 S	0.25 S	16 R	1 S	0.5 S	2 S
17	Poultry B	2	K. pneumonia	32 S	˃16 R	˃320 R	8 R	0.25	0.25	32	˃128 R	32 R	4 I	2 I	0.25 S	0.25 S	16 R	1 S	0.5 S	2 S
27	Poultry B	7	K. pneumonia	32 S	˃16 R	˃320 R	8 R	0.25	0.25	32R	˃128 R	˃64 R	4 I	2 I	0.25 S	0.25 S	16 R	1 S	0.5 S	2 S
28	Poultry B	8	K. pneumonia	32 S	˃16 R	˃320 R	8 R	0.25	0.25	32R	˃128 R	˃64 R	4 I	2 I	0.25 S	0.25 S	16 R	1 S	0.5 S	2 S
29	Poultry B	9	K. pneumonia	32 S	˃16 R	˃320 R	8 R	0.25	0.25		˃128 R	˃64 R	4 I	2 I	0.25 S	0.25 S	16 R	1 S	0.5 S	2 S
30	Poultry B	9	K. pneumonia	32 S	˃16 R	˃320 R	8 R	0.25	0.25	32R	˃128 R	˃64 R	4 I	2 I	0.25 S	0.25 S	16 R	1 S	0.5 S	2 S
33	Poultry B	10	K. pneumonia	32 S	˃16 R	˃320 R	8 R	0.25	0.25	32R	˃128 R	32 R	4 I	2 I	0.25 S	0.25 S	16 R	1 S	0.5 S	2 S
37	Poultry B	12	K. pneumonia	32 S	˃16 R	˃320 R	8 R	0.25	0.25	32R	˃128 R	˃64 R	4 I	2 I	0.25 S	0.25 S	16 R	1 S	0.5 S	2 S
39	Poultry B	13	K. pneumonia	32 S	˃16 R	˃320 R	8 R	0.25	0.25	32R	˃128 R	˃64 R	4 I	2 I	0.25 S	0.25 S	8 R	1 S	0.5 S	2 S
43	Poultry B	14	K. pneumonia	32 S	˃16 R	˃320 R	8 R	0.5S	0.25	32R	˃128 R	˃64 R	16 R	2 I	0.25 S	0.25 S	16 R	1 S	0.5 S	2 S
53	Poultry B	18	K. pneumonia	32 S	˃16 R	˃320 R	8 R	0.25	0.25	32R	˃128 R	32 R	4 I	2 I	0.25 S	0.25 S	16 R	1 S	0.5 S	2 S
112	Poultry B	26	K. pneumonia	256	˃16 R	˃320 R	˃16 R	2 R	4 R	16 I	˃128 R	˃64 R	8 R	2 I	0.5 S	0.25 S	16 R	2 I	0.5 S	2 S
124	Poultry B	33	K. pneumonia	32 S	˃16 R	˃320 R	8 R	0.25	0.25	32R	˃128 R	˃64 R	4 I	2 I	0.25 S	0.25 S	16 R	1 S	0.5 S	2 S
126	Poultry C	34	K. pneumonia	32 S	˃16 R	˃320 R	˃16 R	1 I	2 R	16 I	˃128 R	˃64 R	8 R	2 I	0.25 S	0.25 S	16 R	2 I	0.5 S	4 I
211	Poultry C	8	K. pneumonia	32 S	˃16 R	˃320 R	˃16 R	0.5S	2 R		˃128 R	˃64 R	16 R	32 R	0.25 S	0.25 S	16 R	1 S	0.5 S	2 S
48	Poultry D	16	K.pneumoniae	32 S	˃16 R	˃320 R	8 R	0.25	0.25	32R	˃128 R	˃64 R	4 I	2 I	0.25 S	0.25 S	16 R	1 S	0.5 S	2 S
51	Poultry D	17	K.pneumoniae	32 S	˃16 R	˃320 R	8 R	0.25	0.25	32R	˃128 R	˃64 R	4 I	2 I	0.25 S	0.25 S	16 R	1 S	0.5 S	2 S
62	Poultry D	3	K.pneumoniae	32 S	˃16 R	˃320 R	8 R	0.25	0.25	32R	˃128 R	˃64 R	4 I	2 I	0.25 S	0.25 S	16 R	1 S	0.5 S	2 S
64	Poultry D	5	K.pneumoniae	32 S	˃16 R	˃320 R	˃16 R	˃4 R	˃8 R	128	˃128 R	˃64 R	16 R	2 I	0.25 S	0.25 S	˃64 R	4 R	0.5 S	2 S
100	Poultry D	19	K.pneumoniae	32 S	˃16 R	˃320 R	8 R	0.5S	4 R		˃128 R	˃64 R	8 R	4 I	1 S	0.25 S	16 R	1 S	˃16R	2 S
103	Poultry E	20	K.pneumoniae	16 S	˃16 R	˃320 R	˃16 R	1 I	2 R		˃128 R	˃64 R	16 R	2 I	0.25 S	0.25 S	16 R	0.5 S	0.5 S	2 S
105	Poultry D	21	K.pneumoniae	64 R	˃16 R	˃320 R	˃16 R	1 I	2 R	16 I	˃128 R	˃64 R	8 R	2 I	0.25 S	0.25 S	16 R	2 I	0.5 S	4 I
49	Poultry D	16	L.adecarboxylata	64 R	˃16 R	˃320 R	˃16 R	1 I	2 R	16 I	˃128 R	˃64 R	16 R	˃64R	0.25 S	0.25 S	16 R	0.5 S	0.5 S	2 S
76	Poultry D	5	L.adecarboxylata	128	˃16 R	˃320 R	˃16 R	1 I	2 R	8 S	˃128 R	˃64 R	16 R	8 R	0.25 S	0.25 S	16 R	0.5 S	0.5 S	2 S
83	Poultry D	8	L.adecarboxylata	64 R	˃16 R	˃320 R	˃16 R	1 I	2 R	8 S	˃128 R	˃64 R	16 R	8 R	0.25 S	0.25 S	16 R	0.5 S	0.5 S	2 S
86	Poultry D	10	L.adecarboxylata	128	˃16 R	˃320 R	˃16 R	1 I	2 R	8 S	˃128 R	˃64 R	16 R	8 R	0.25 S	0.25 S	16 R	0.5 S	0.5 S	2 S
89	Poultry D	12	L.adecarboxylata	128	˃16 R	˃320 R	˃16 R	1 I	2 R	8 S	˃128 R	˃64 R	16 R	8 R	0.25 S	0.25 S	16 R	0.5 S	0.5 S	2 S
115	Poultry D	28	L.adecarboxylata	128	˃16 R	˃320 R	˃16 R	1 I	2 R		˃128 R	˃64 R	16 R	8 R	0.25 S	0.25 S	16 R	0.5 S	0.5 S	2 S
129	Poultry D	36	L.adecarboxylata	128	˃16 R	˃320 R	˃16 R	1 I	2 R		˃128 R	˃64 R	16 R	8 R	0.25 S	0.25 S	16 R	0.5 S	0.5 S	2 S
67	Poultry D	1	M. morganii	256	˃16 R	˃320 R	8 R	˃4 R	4 R	4 I	˃128 R	32 R	1 I	1 I	2 S	0.25 S	1 I	1 R	˃16R	2 S
77	Poultry D	6	M. morganii	256	˃16 R	˃320 R	8 R	˃4 R	4 R		˃128 R	16 R	1 I	1 I	1 S	0.25 S	1 I	1 S	˃16R	2 S
79	Poultry D	7	M. morganii	256	˃16 R	˃320 R	8 R	˃4 R	˃8 R		˃128 R	˃64 R	1 I	1 I	2 S	0.25 S	1 I	1 S	˃16R	2 S
88	Poultry D	11	M. morganii	256	˃16 R	˃320 R	8 R	˃4 R	˃8R		˃128 R	˃64 R	1 I	4 I	1 S	0.25 S	2 I	2 I	˃16R	2 S
95	Poultry D	16	M. morganii	256	˃16 R	˃320 R	8 R	˃4 R	˃8 R		˃128 R	˃64 R	1 I	4 I	2 S	0.25 S	2 I	2 I	˃16R	2 S
97	Poultry D	17	M. morganii	256	˃16 R	˃320 R	8 R	˃4 R	˃8 R		˃128 R	32 R	1 I	1 I	2 S	0.25 S	1 I	1 S	˃16R	2 S
99	Poultry D	18	M. morganii	256	˃16 R	˃320 R	˃16R	˃4 R	˃8 R		˃128 R	˃64 R	16 R	32 R	1 S	0.25 S	16 R	1 S	˃16R	2 S
110	Poultry D	25	M. morganii	256	˃16 R	˃320 R	8 R	˃4 R	˃8 R		˃128 R	32 R	1 I	1 I	2 S	0.25 S	1 I	1 S	˃16R	2 S
114	Poultry D	28	M. morganii	256	˃16 R	˃320 R	8 R	˃4 R	˃8 R		˃128 R	32 R	1 I	1 I	2 S	0.25 S	1 I	1 S	˃16R	2 S
123	Poultry D	33	M. morganii	256	˃16 R	˃320 R	8 R	˃4 R	˃8 R		˃128 R	32 R	1 I	1 I	2 S	0.25 S	1 I	1 S	˃16R	2 S
131	Poultry D	37	M. morganii	256	˃16 R	˃320 R	8 R	˃4 R	˃8 R	4S	˃128 R	32 R	1 I	1 I	2 S	0.25 S	1 I	2 I	˃16R	2 S
133	Poultry D	39	M. morganii	256	˃16 R	˃320 R	8 R	˃4 R	˃8 R	4 S	˃128 R	32 R	1 I	1 I	2 S	0.25 S	1 I	2 I	˃16R	2 S
